# Supplementary material for: ZnZrO2-adorned graphitic carbon nitride (g-C3N4) on a laser-induced graphene electrode as an electrochemical sensor for the detection of ractopamine in meat samples
Source: Royal Society of Chemistry journal article supplement (doi:10.1039/d4nj03837a), 2024-01-01
Supplement: d4nj03837a1.pdf [file d4nj03837a1.pdf]

## **SUPPORTING INFORMATION**

### **ZnZrO<sub>2</sub> Adorns Graphitic Carbon Nitride (g-C<sub>3</sub>N<sub>4</sub>) On Laser-Induced Graphene Electrode as an Electrochemical Sensor for Detection of *Ractopamine* in Meat Samples**

**R. Ganapathi Raman<sup>a,b,\*</sup>, M. Muhammed Shameem<sup>a</sup>, P. Kavitha<sup>c</sup>, C. Sankar<sup>d</sup> and  
S. R. Kalaivani<sup>e</sup>**

<sup>a</sup>Department of Physics, Noorul Islam Centre for Higher Education, Kumaracoil -629 180, Thuckalay, Tamil Nadu, India.

<sup>b</sup>Department of Physics, Saveetha Engineering College (Autonomous), Chennai - 602 105, Tamil Nadu, India.

<sup>c</sup>Department of Physics, Sona College of Technology (Autonomous), Salem-636 005, Tamil Nadu, India.

<sup>d</sup>Department of Chemistry, Velammal College of Engineering and Technology, Madurai-625 009, Tamil Nadu, India.

<sup>e</sup>Department of chemistry, SNS College of Technology, Coimbatore – 641035, Tamil Nadu, India.

---

\*Corresponding Author: R. Ganapathi Raman, E. Mail id – ganapathiraman83@gmail.com

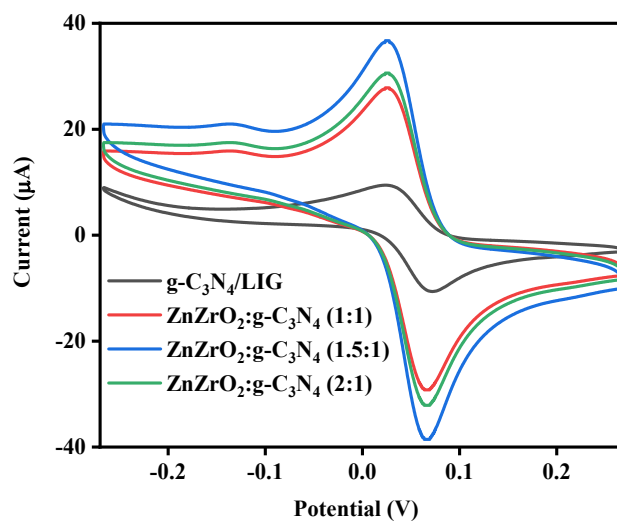

**Figure S1.** CVs of  $\text{ZnZrO}_2@\text{g-C}_3\text{N}_4$  with different composition of  $\text{ZnZrO}_2$  and  $\text{g-C}_3\text{N}_4$  at the scan rate of  $50 \text{ mV} \cdot \text{s}^{-1}$  in  $5 \text{ mM K}_3[\text{Fe}(\text{CN})_6]$  solution at 1:1, 1.5:1 and 2:1 of  $\text{ZnZrO}_2:\text{g-C}_3\text{N}_4$ .

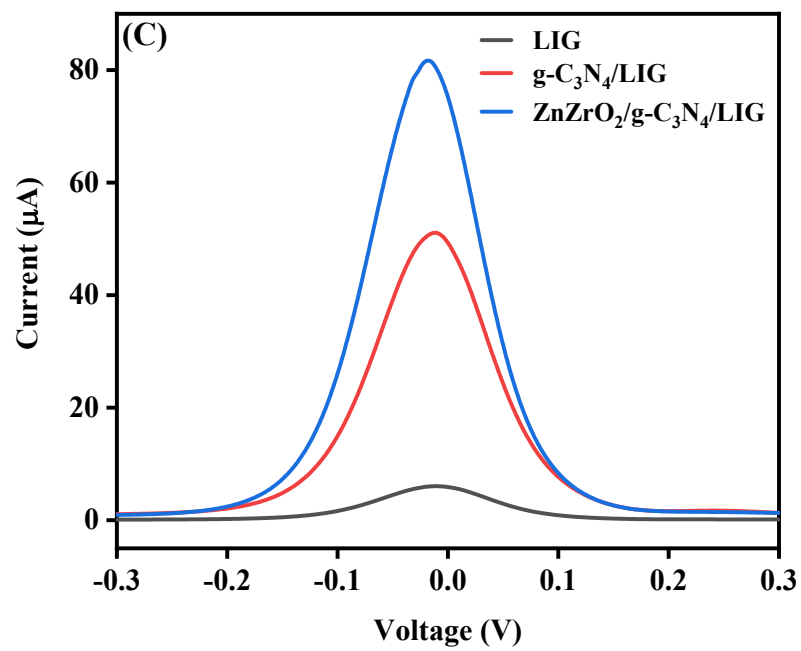

**Figure S2.** DPV recorded at different electrodes.

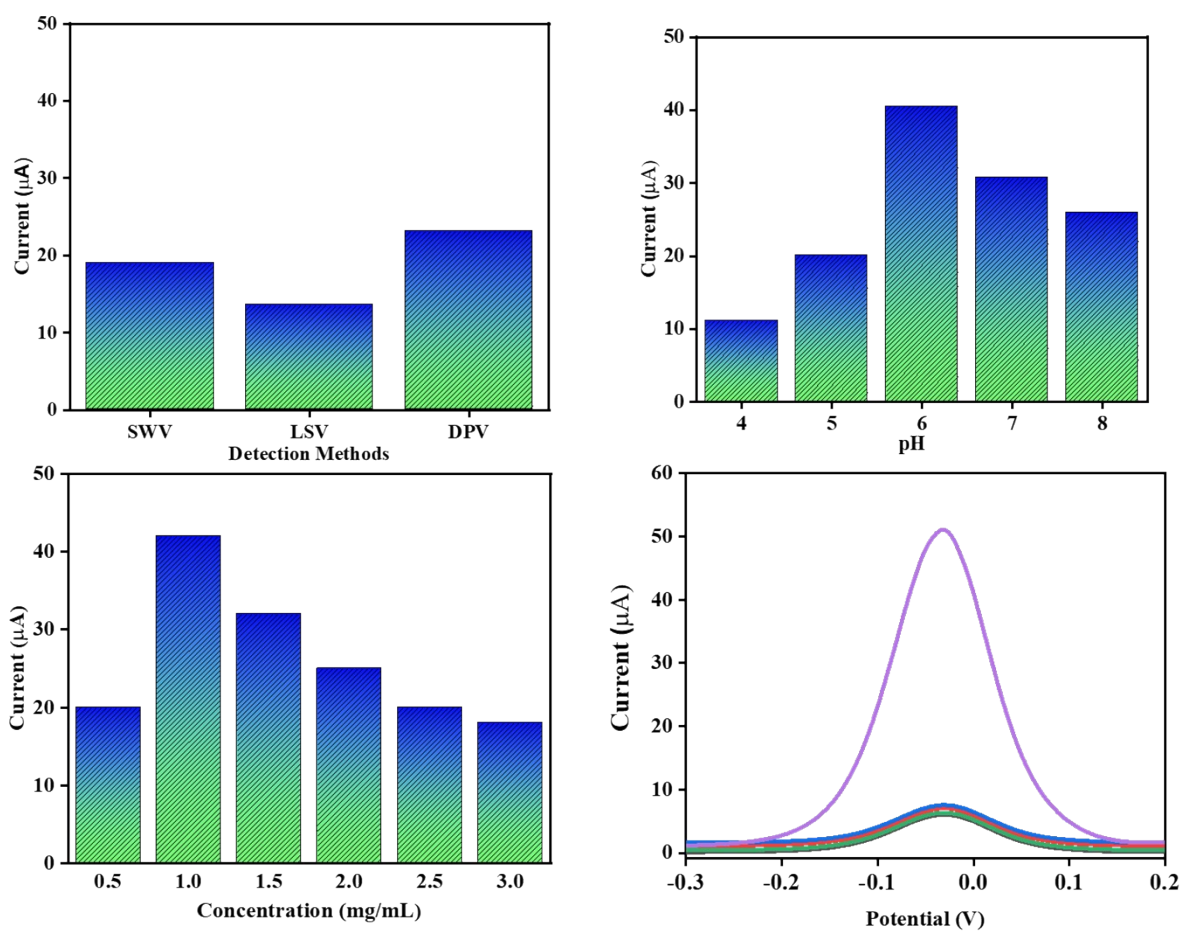

**Figure S3.** Electrochemical measurements and optimization conditions (A) Different Techniques, (B) Effect of pH, (C) Effect of Concentration of electrode material, (D) Effect of Potential
